# Supplementary material for: Effects of water, sanitation, handwashing, and nutritional interventions on telomere length among children in a cluster-randomized controlled trial in rural Bangladesh
Source: eLife journal article supplement (doi:10.7554/elife.29365), 2017-10-04
Supplement: supp [file elife-29365-supp-v1.zip]

Archive with 7 entries (7 files):
- elife_poa_e29365_Table_1_source_data_1.zip
- elife_poa_e29365_Transparent_Reporting_File.pdf
- elife_poa_e29365_Table_4_source_data_1.zip
- elife_poa_e29365_Table_3_source_data_1.zip
- elife_poa_e29365_Figure_1_source_data_1.zip
- elife_poa_e29365_Figure_2_source_data_1.zip
- elife_poa_e29365_Table_2_source_data_1.zip
